# Supplementary material
Source: publisher figshare collection journal article supplement (https://acs.figshare.com/ndownloader/files/5138821)
Supplement: Supplementary file 1 [file 5138821]

# Supporting Online Information for “Dispersion of Solute by Electrokinetic Flow through Post Arrays and Wavy-Walled Channels”

J.J. Kirchner and E.F. Hasselbrink, Jr.\*  
Dept. of Mechanical Engineering  
University of Michigan  
Ann Arbor, MI 48109-2125

July 2, 2004

## 1 Flow solution and validation

The computational domain is mapped as shown in Fig. 1(b). The domain is then a simple square and boundary conditions and gridding become very easy to apply. This also has significant advantages in the scalar transport simulations, as will be evident momentarily. In this formulation the governing equations are:

$$\nabla_{\phi\psi}^2 x(\phi, \psi) = 0 = \nabla_{\phi\psi}^2 y(\phi, \psi), \quad (1)$$

where the subscript  $\phi\psi$  denotes derivatives in  $(\phi, \psi)$ -space.

The mapping from  $(\phi, \psi)$ - to  $(x, y)$ -space is obtained from the derivatives:<sup>1</sup>

$$\frac{\partial \phi}{\partial x} = \frac{1}{J} \frac{\partial y}{\partial \psi}, \quad \frac{\partial \phi}{\partial y} = -\frac{1}{J} \frac{\partial x}{\partial \psi}, \quad (2)$$

$$\frac{\partial \psi}{\partial y} = \frac{1}{J} \frac{\partial x}{\partial \phi}, \quad \frac{\partial \psi}{\partial x} = -\frac{1}{J} \frac{\partial y}{\partial \phi}, \quad (3)$$

where the Jacobian  $J$  is the determinant of the Jacobian matrix  $\mathbf{J}$  (note that  $J = 1/|\mathbf{u}|^2$ )

$$J = \left| \frac{\partial(x, y)}{\partial(\phi, \psi)} \right| = \begin{vmatrix} \frac{\partial x}{\partial \phi} & \frac{\partial x}{\partial \psi} \\ \frac{\partial y}{\partial \phi} & \frac{\partial y}{\partial \psi} \end{vmatrix}. \quad (4)$$

In order to solve these equations, our initial approach was, given  $f_{\text{bot}}(x)$  and  $f_{\text{top}}(x)$ , to solve Eqs. 1 with a second-order central difference scheme and first-order differencing to approximate Neumann boundary conditions.<sup>2</sup> The linear system of equations produced by the second-order central difference scheme is block-tridiagonal and can be solved using the Block-Thomas algorithm.<sup>3</sup> The Cauchy-Riemann conditions were also solved using a second-order central difference scheme, and along the boundary

---

\*Corresponding author: ehass@engin.umich.edu (734) 647-7859

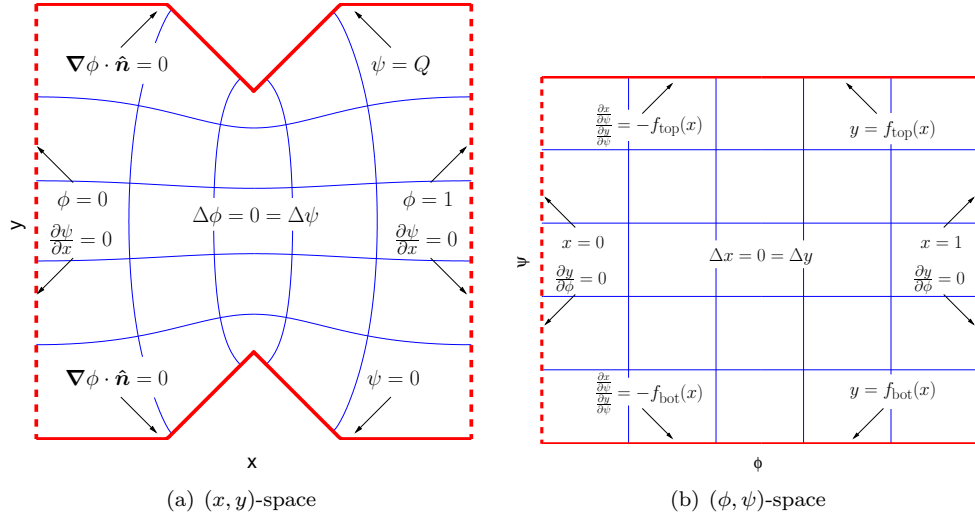

Figure 1: Diagram of governing equations and boundary conditions for an example geometry (one unit cell of in-phase diamond-shaped posts).

where a symmetric stencil was not possible, a second-order asymmetric difference scheme was used.<sup>4</sup> The equations for the  $x$ - and  $y$ -fields are coupled through the top and bottom boundary conditions, so the matrix equations for each were solved iteratively until the residual is less than  $O[10^{-10}]$  on a  $301 \times 301$  grid.<sup>5,6</sup>

However, in some geometries, this method was found to be subject to numerical instabilities near sharp corners where singularities exist in the exact solution. Appropriate numerical techniques to suppress these instabilities were employed, but we desired to confirm the final results using an alternative method. For these geometries, conformal mapping via the Schwarz-Christoffel transformation proved to be much more robust.<sup>7-13</sup> Since the transformation is defined only for polygonal geometries, squares and diamonds were defined exactly but circles are approximated by polygons made of 64 equal line segments. Values of the  $x$ - and  $y$ -fields for a regular grid of  $\phi$ - and  $\psi$ -values were thus be found  $x + iy = f(\phi + i\psi)$  on a  $601 \times 601$  grid. Solutions were validated by testing the orthogonality of  $x$ - and  $y$ -fields ( $\nabla_{\phi\psi}x \cdot \nabla_{\phi\psi}y = 0$ ), which show relative deviations  $O[10^{-3}]$ , with most of the error in both cases occurring near regions where the boundary changes rapidly. Flowrates obtained with the two methods were in agreement to within 1% in all cases; the Schwartz-Christoffel solution was used in all cases shown in the paper.

## 2 Solute transport solution and validation

Particle transport is modelled using a split-step convection-diffusion scheme.<sup>14</sup> The convection-step is approximated by a total differential

$$\delta\phi = \frac{\partial\phi}{\partial x}\delta x + \frac{\partial\phi}{\partial y}\delta y = \nabla\phi \cdot \delta\mathbf{x}, \quad (5)$$

Recognizing that  $\delta\mathbf{x} = \mathbf{u}\delta t$ , this is  $\delta\phi = |\mathbf{u}|^2\delta t$ . Recalling  $J = 1/|\mathbf{u}|^2$ , the convection step is  $\delta\phi = \text{Pe} \cdot \delta t/J$ , where the Péclet number  $\text{Pe} = (\Delta\phi_x/\Delta x)h/D_{12}$  is a non-dimensional velocity scale.

The length of the diffusion step  $r_{xy}$  is calculated from a normal distribution with  $\sigma = \sqrt{4\delta t}$ , the factor of  $\sqrt{2}$  in  $\sigma$  stemming from the two-dimensional nature of the problem.<sup>15</sup> On the other hand,  $(\phi, \psi)$ -space diffusion length  $r_{\phi\psi} = r_{xy}/\sqrt{J}$ . The half-diffusion-steps thus have a length  $R \cdot \sqrt{2\delta t}$ ,<sup>15–19</sup> where  $R$  is a random number from a normal distribution generated using the Box-Muller method.<sup>20–22</sup> The direction of the diffusion step  $\theta_{xy}$  is distorted in  $(\phi, \psi)$ -space to  $\theta_{\phi\psi} = \tan^{-1}[\delta\psi/\delta\phi]$ . Writing  $\delta\psi$  and  $\delta\phi$  in terms of total differentials,  $\theta_{\phi\psi}$  can be defined in terms of the local velocity field  $\theta_{\phi\psi} = \tan^{-1}[(u\delta y - v\delta x)/(u\delta x + v\delta y)]$ .

Timestep independence was tested and established in the more extreme geometry (high  $m$ ) cases. Infinite accelerations near corners cannot be avoided due to the use of potential flow as a model for pure electrophoretic transport. Thus if  $Pe/J$  is too large (near convex corners where fluid acceleration is highest) particles can shoot too far. When such cases are detected, we employ an adaptive integration scheme that is somewhat computationally expensive but is quite robust and need only be performed for a very small fraction of the particles.<sup>23</sup> This technique finds the displacement along a streamline iteratively, numerically integrating the time elapsed until it matches the timestep.

This method was validated against theory for pressure-driven flow between flat plates<sup>24</sup> using various values of  $N$ . Excellent agreement (shown in Fig. 2) with  $\chi^2 = 0.19$  was obtained nearly independently of the choice for  $N > 5000$ . A value of  $N = 50\,000$  was chosen for practical computational expense while keeping statistical error very low.

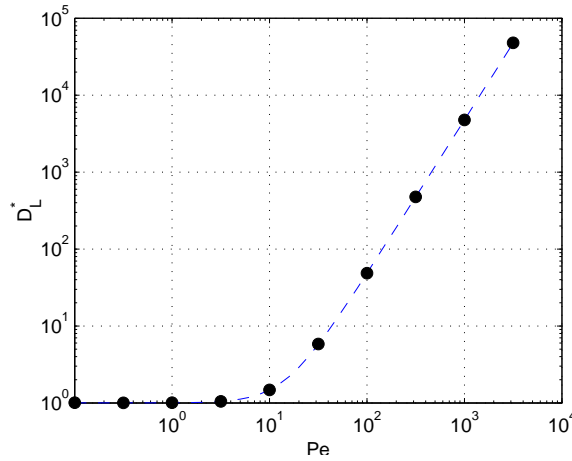

Figure 2: Comparison of simulation results and theory with  $N = 50\,000$  particles. The dashed line represents theory;  $\chi^2 = 0.19$ .

### 3 Tabulated Curve Fits to $D_L(Pe)$ Data

Below are results for the best-fit parameters for all three curve fits, as well as the  $\chi^2$  values for each curve fit. Values for  $\Lambda$  for each geometry are also tabulated as a function of geometry and  $m$ .

Table 1: Fit parameters and length scales for in-line circles.

| $m$   | $\Lambda$ | $D_{L0}$ | $\sqrt{\alpha_1}$ | $\chi_1^2$ | $\sqrt[n_2]{\alpha_2}$ | $n_2$ | $\chi_2^2$ | $\alpha_{3,1}$ | $\sqrt{\alpha_{3,2}}$ | $\chi_3^2$ |
|-------|-----------|----------|-------------------|------------|------------------------|-------|------------|----------------|-----------------------|------------|
| 0.150 | 0.771     | 0.922    | 88                | 21         | 84                     | 1.955 | 16         | 286            | 91                    | 6          |
| 0.169 | 0.734     | 0.906    | 75                | 32         | 71                     | 1.947 | 24         | 191            | 78                    | 8          |
| 0.200 | 0.674     | 0.883    | 62                | 52         | 56                     | 1.928 | 37         | 112            | 65                    | 9          |
| 0.226 | 0.623     | 0.862    | 55                | 76         | 49                     | 1.912 | 53         | 78             | 58                    | 11         |
| 0.250 | 0.575     | 0.843    | 50                | 118        | 43                     | 1.892 | 83         | 54             | 54                    | 16         |
| 0.282 | 0.510     | 0.794    | 45                | 213        | 36                     | 1.847 | 144        | 32             | 49                    | 26         |
| 0.300 | 0.474     | 0.774    | 44                | 266        | 33                     | 1.808 | 163        | 26             | 48                    | 22         |
| 0.339 | 0.397     | 0.726    | 42                | 458        | 25                     | 1.692 | 229        | 16             | 48                    | 18         |
| 0.350 | 0.373     | 0.703    | 42                | 527        | 22                     | 1.640 | 227        | 14             | 48                    | 13         |
| 0.357 | 0.358     | 0.690    | 42                | 586        | 21                     | 1.606 | 244        | 12             | 49                    | 12         |
| 0.395 | 0.278     | 0.657    | 44                | 865        | 14                     | 1.454 | 178        | 9              | 52                    | 25         |

Table 2: Fit parameters and length scales for staggered circles.

| $m$   | $\Lambda$ | $D_{L0}$ | $\sqrt{\alpha_1}$ | $\chi_1^2$ | $\sqrt[n_2]{\alpha_2}$ | $n_2$ | $\chi_2^2$ | $\alpha_{3,1}$ | $\sqrt{\alpha_{3,2}}$ | $\chi_3^2$ |
|-------|-----------|----------|-------------------|------------|------------------------|-------|------------|----------------|-----------------------|------------|
| 0.150 | 0.776     | 0.939    | 90                | 15         | 86                     | 1.962 | 12         | 342            | 92                    | 4          |
| 0.169 | 0.741     | 0.921    | 78                | 21         | 74                     | 1.957 | 16         | 245            | 80                    | 5          |
| 0.200 | 0.685     | 0.894    | 64                | 48         | 58                     | 1.927 | 32         | 118            | 67                    | 6          |
| 0.226 | 0.638     | 0.864    | 56                | 70         | 50                     | 1.915 | 48         | 83             | 59                    | 10         |
| 0.250 | 0.594     | 0.850    | 52                | 109        | 44                     | 1.889 | 71         | 58             | 55                    | 14         |
| 0.282 | 0.536     | 0.807    | 47                | 179        | 38                     | 1.855 | 119        | 38             | 52                    | 21         |
| 0.300 | 0.504     | 0.770    | 45                | 238        | 35                     | 1.820 | 146        | 29             | 50                    | 19         |
| 0.339 | 0.436     | 0.750    | 45                | 371        | 29                     | 1.734 | 199        | 20             | 51                    | 24         |
| 0.350 | 0.416     | 0.738    | 45                | 430        | 26                     | 1.685 | 198        | 18             | 51                    | 17         |
| 0.357 | 0.404     | 0.728    | 45                | 452        | 26                     | 1.665 | 192        | 17             | 52                    | 21         |
| 0.395 | 0.338     | 0.704    | 47                | 708        | 18                     | 1.505 | 159        | 12             | 55                    | 36         |

Table 3: Fit parameters and length scales for in-line diamonds.

| $m$   | $\Lambda$ | $D_{L0}$ | $\sqrt{\alpha_1}$ | $\chi_1^2$ | $\sqrt[n_2]{\alpha_2}$ | $n_2$ | $\chi_2^2$ | $\alpha_{3,1}$ | $\sqrt{\alpha_{3,2}}$ | $\chi_3^2$ |
|-------|-----------|----------|-------------------|------------|------------------------|-------|------------|----------------|-----------------------|------------|
| 0.141 | 0.748     | 0.953    | 118               | 7          | 113                    | 1.964 | 4          | 653            | 120                   | 2          |
| 0.150 | 0.733     | 0.891    | 105               | 31         | 99                     | 1.946 | 25         | 320            | 108                   | 15         |
| 0.200 | 0.645     | 0.912    | 74                | 21         | 71                     | 1.965 | 18         | 249            | 76                    | 7          |
| 0.212 | 0.624     | 0.884    | 68                | 38         | 64                     | 1.946 | 29         | 161            | 71                    | 11         |
| 0.250 | 0.560     | 0.874    | 58                | 45         | 54                     | 1.943 | 35         | 119            | 61                    | 10         |
| 0.283 | 0.504     | 0.830    | 52                | 75         | 47                     | 1.920 | 54         | 78             | 55                    | 14         |
| 0.300 | 0.475     | 0.814    | 50                | 95         | 44                     | 1.911 | 69         | 64             | 53                    | 17         |
| 0.350 | 0.387     | 0.758    | 48                | 187        | 39                     | 1.864 | 133        | 39             | 52                    | 29         |
| 0.354 | 0.381     | 0.748    | 47                | 195        | 39                     | 1.861 | 138        | 37             | 52                    | 30         |
| 0.424 | 0.242     | 0.625    | 51                | 459        | 33                     | 1.724 | 294        | 20             | 59                    | 64         |

Table 4: Fit parameters and length scales for staggered diamonds.

| $m$   | $\Lambda$ | $D_{L0}$ | $\sqrt{\alpha_1}$ | $\chi_1^2$ | $n_2/\sqrt{\alpha_2}$ | $n_2$ | $\chi_2^2$ | $\alpha_{3,1}$ | $\sqrt{\alpha_{3,2}}$ | $\chi_3^2$ |
|-------|-----------|----------|-------------------|------------|-----------------------|-------|------------|----------------|-----------------------|------------|
| 0.141 | 0.753     | 0.951    | 119               | 6          | 116                   | 1.971 | 5          | 739            | 121                   | 2          |
| 0.150 | 0.738     | 0.951    | 110               | 6          | 107                   | 1.976 | 5          | 667            | 111                   | 2          |
| 0.200 | 0.656     | 0.923    | 75                | 20         | 71                    | 1.952 | 13         | 242            | 78                    | 5          |
| 0.212 | 0.637     | 0.916    | 70                | 17         | 68                    | 1.965 | 13         | 257            | 72                    | 5          |
| 0.250 | 0.579     | 0.874    | 59                | 42         | 55                    | 1.941 | 31         | 125            | 62                    | 9          |
| 0.283 | 0.532     | 0.833    | 54                | 70         | 49                    | 1.923 | 51         | 84             | 57                    | 14         |
| 0.300 | 0.509     | 0.821    | 52                | 83         | 47                    | 1.919 | 62         | 73             | 55                    | 16         |
| 0.350 | 0.444     | 0.780    | 51                | 137        | 42                    | 1.875 | 90         | 49             | 55                    | 18         |
| 0.354 | 0.439     | 0.774    | 50                | 142        | 43                    | 1.882 | 100        | 49             | 54                    | 22         |
| 0.424 | 0.359     | 0.710    | 56                | 276        | 41                    | 1.793 | 176        | 33             | 63                    | 34         |
| 0.495 | 0.289     | 0.651    | 75                | 422        | 43                    | 1.636 | 202        | 30             | 89                    | 33         |

Table 5: Fit parameters and length scales for in-line squares.

| $m$   | $\Lambda$ | $D_{L0}$ | $\sqrt{\alpha_1}$ | $\chi_1^2$ | $n_2/\sqrt{\alpha_2}$ | $n_2$ | $\chi_2^2$ | $\alpha_{3,1}$ | $\sqrt{\alpha_{3,2}}$ | $\chi_3^2$ |
|-------|-----------|----------|-------------------|------------|-----------------------|-------|------------|----------------|-----------------------|------------|
| 0.100 | 0.761     | 0.910    | 107               | 20         | 102                   | 1.958 | 16         | 372            | 110                   | 7          |
| 0.150 | 0.644     | 0.901    | 60                | 46         | 55                    | 1.938 | 35         | 128            | 62                    | 14         |
| 0.200 | 0.540     | 0.848    | 42                | 110        | 35                    | 1.883 | 63         | 45             | 45                    | 16         |
| 0.250 | 0.446     | 0.777    | 34                | 280        | 24                    | 1.788 | 133        | 19             | 37                    | 19         |
| 0.300 | 0.361     | 0.695    | 30                | 594        | 14                    | 1.617 | 179        | 9              | 33                    | 35         |
| 0.350 | 0.278     | 0.634    | 28                | 1090       | 8                     | 1.483 | 56         | 5              | 31                    | 272        |

Table 6: Fit parameters and length scales for staggered squares.

| $m$   | $\Lambda$ | $D_{L0}$ | $\sqrt{\alpha_1}$ | $\chi_1^2$ | $n_2/\sqrt{\alpha_2}$ | $n_2$ | $\chi_2^2$ | $\alpha_{3,1}$ | $\sqrt{\alpha_{3,2}}$ | $\chi_3^2$ |
|-------|-----------|----------|-------------------|------------|-----------------------|-------|------------|----------------|-----------------------|------------|
| 0.100 | 0.765     | 0.949    | 109               | 8          | 107                   | 1.981 | 7          | 613            | 112                   | 3          |
| 0.150 | 0.650     | 0.900    | 60                | 35         | 55                    | 1.932 | 21         | 130            | 63                    | 3          |
| 0.200 | 0.545     | 0.843    | 42                | 108        | 36                    | 1.888 | 65         | 47             | 45                    | 7          |
| 0.250 | 0.451     | 0.777    | 34                | 274        | 24                    | 1.789 | 122        | 20             | 38                    | 11         |
| 0.300 | 0.363     | 0.696    | 30                | 562        | 15                    | 1.636 | 174        | 10             | 34                    | 40         |
| 0.350 | 0.277     | 0.644    | 29                | 1045       | 8                     | 1.488 | 60         | 6              | 32                    | 254        |

Table 7: Fit parameters and length scales for in-phase sinusoidal channels.

| $m$   | $\Lambda$ | $D_{L0}$ | $\sqrt{\alpha_1}$ | $\chi_1^2$ | $n_2/\sqrt{\alpha_2}$ | $n_2$ | $\chi_2^2$ | $\alpha_{3,1}$ | $\sqrt{\alpha_{3,2}}$ | $\chi_3^2$ |
|-------|-----------|----------|-------------------|------------|-----------------------|-------|------------|----------------|-----------------------|------------|
| 0.030 | 0.926     | 1.003    | 953               | 1          | 961                   | 2.019 | 1          | $10^{17}$      | 953                   | 1          |
| 0.060 | 0.830     | 0.973    | 257               | 7          | 248                   | 1.960 | 6          | 1437           | 263                   | 3          |
| 0.090 | 0.725     | 0.931    | 126               | 36         | 117                   | 1.928 | 27         | 294            | 132                   | 10         |
| 0.120 | 0.619     | 0.882    | 81                | 83         | 72                    | 1.901 | 60         | 115            | 87                    | 18         |

Table 8: Fit parameters and length scales for out-of-phase sinusoidal channels.

| $m$   | $\Lambda$ | $D_{L0}$ | $\sqrt{\alpha_1}$ | $\chi_1^2$ | $\sqrt[n_2]{\alpha_2}$ | $n_2$ | $\chi_2^2$ | $\alpha_{3,1}$ | $\sqrt{\alpha_{3,2}}$ | $\chi_3^2$ |
|-------|-----------|----------|-------------------|------------|------------------------|-------|------------|----------------|-----------------------|------------|
| 0.030 | 0.926     | 0.962    | 891               | 5          | 867                    | 1.943 | 4          | 7080           | 918                   | 3          |
| 0.060 | 0.830     | 0.954    | 247               | 14         | 236                    | 1.949 | 11         | 1053           | 255                   | 6          |
| 0.090 | 0.722     | 0.937    | 122               | 35         | 113                    | 1.928 | 26         | 286            | 128                   | 9          |
| 0.120 | 0.610     | 0.875    | 78                | 98         | 68                     | 1.890 | 70         | 98             | 83                    | 20         |

Table 9: Fit parameters and length scales for in-phase sawtooth channels.

| $m$   | $\Lambda$ | $D_{L0}$ | $\sqrt{\alpha_1}$ | $\chi_1^2$ | $\sqrt[n_2]{\alpha_2}$ | $n_2$ | $\chi_2^2$ | $\alpha_{3,1}$ | $\sqrt{\alpha_{3,2}}$ | $\chi_3^2$ |
|-------|-----------|----------|-------------------|------------|------------------------|-------|------------|----------------|-----------------------|------------|
| 0.030 | 0.930     | 0.990    | 1358              | 1          | 1319                   | 1.918 | 1          | 14166          | 1396                  | 1          |
| 0.060 | 0.842     | 0.975    | 361               | 5          | 352                    | 1.963 | 4          | 2581           | 370                   | 2          |
| 0.090 | 0.743     | 0.946    | 174               | 22         | 164                    | 1.945 | 18         | 558            | 180                   | 8          |
| 0.120 | 0.639     | 0.901    | 109               | 63         | 98                     | 1.905 | 46         | 181            | 116                   | 14         |

Table 10: Fit parameters and length scales for out-of-phase sawtooth channels.

| $m$   | $\Lambda$ | $D_{L0}$ | $\sqrt{\alpha_1}$ | $\chi_1^2$ | $\sqrt[n_2]{\alpha_2}$ | $n_2$ | $\chi_2^2$ | $\alpha_{3,1}$ | $\sqrt{\alpha_{3,2}}$ | $\chi_3^2$ |
|-------|-----------|----------|-------------------|------------|------------------------|-------|------------|----------------|-----------------------|------------|
| 0.030 | 0.929     | 0.986    | 1309              | 1          | 1292                   | 1.963 | 1          | 20091          | 1333                  | 1          |
| 0.060 | 0.840     | 0.974    | 351               | 8          | 335                    | 1.942 | 5          | 1839           | 361                   | 3          |
| 0.090 | 0.737     | 0.974    | 171               | 14         | 163                    | 1.956 | 12         | 678            | 176                   | 5          |
| 0.120 | 0.627     | 0.921    | 105               | 47         | 96                     | 1.921 | 35         | 214            | 111                   | 13         |

## References

- [1] Jeppson, R.W. *J. Fluid Mech.* **1970**, *40*, 215–223.
- [2] Morton, K.W.; Mayers, D.F. *Numerical Solution of Partial Differential Equations*; Cambridge University: 1994.
- [3] Ciarlet, P.G. *Introduction to Numerical Linear Algebra and Optimisation*; Cambridge University: 1989.
- [4] Thom, A.; Apelt, C.J. *Field Computation in Engineering & Physics*; D. Van Nostrand: London, 1961.
- [5] Press, W.H.; Flannery, B.P.; Teukolsky, S.A.; Vetterling, W.T. *Numerical Recipes in C: The Art of Scientific Computing*, 2nd ed.; Cambridge University: 1993.
- [6] Lau, H.T. *A Numerical Library in C for Scientists and Engineers*; CRC: 1994.
- [7] Henrici, P. *Applied and Computational Complex Analysis*; John Wiley & Sons: 1974.
- [8] Floryan, J.M. *J. Comput. Phys.* **1985**, *58*, 229–245.
- [9] Floryan, J.M.; Zemach, C. *J. Comput. Appl. Math.* **1993**, *46*, 77–102.
- [10] Batchelor, G.K. *An Introduction to Fluid Dynamics*; Cambridge University: 2000.
- [11] Driscoll, T.A. *ACM T. Math. Software* **1996**, *22*, 168–186.
- [12] Driscoll, T.A.; Trefethen, L.N. *Schwarz-Christoffel Mapping*; Cambridge University: 2002.
- [13] Driscoll, T.A. *Schwarz-Christoffel Toolbox for MATLAB*;  
<http://www.math.udel.edu/~driscoll/software/SC/>, 2003.
- [14] Lingevitch, J.F.; Bernoff, A.J. *J. Fluid Mech.* **1994**, *270*, 219–249.
- [15] Einstein, A. *Investigations on the Theory of the Brownian Movement*; Dover: New York, 1956.
- [16] Griffiths, S.K.; Nilson, R.H. *Anal. Chem.* **2000**, *72*, 5473–5482.
- [17] Griffiths, S.K.; Nilson, R.H. *Anal. Chem.* **2001**, *73*, 272–278.
- [18] Ghoniem, A.F.; Sherman, F.S. *J. Comput. Phys.* **1985**, *61*, 1–37.
- [19] Chorin, A.J. *J. Fluid Mech.* **1973**, *57*, 785–796.
- [20] Box, G.E.P.; Muller, M.E. *Ann. Math. Stat.* **1958**, *29*, 610–611.
- [21] Robers, S. *J. Comput. Phys.* **1985**, *58*, 29–43.
- [22] Bevington, P.R.; Robinson, D.K. *Data Reduction and Error Analysis for the Physical Sciences*, 2nd ed.; McGraw-Hill: 1992.
- [23] Kirchner, J.J. Master Thesis, Univ. of Michigan Mech. Eng. Dept., 2003.
- [24] Wooding, R.A. *J. Fluid Mech.* **1960**, *7*, 501–515.
